# Supplementary material for: The Spatial Relationship between Apparent Diffusion Coefficient and Standardized Uptake Value of 18F-Fluorodeoxyglucose Has a Crucial Influence on the Numeric Correlation of Both Parameters in PET/MRI of Lung Tumors
Source: Hindawi journal article supplement (doi:10.1155/2017/8650853), 2017-01-01
Supplement: f6 [file 8650853.f6.pdf]

|                                                             | Reader 1             |                  |                      | Reader 3             |                  |                      |
|-------------------------------------------------------------|----------------------|------------------|----------------------|----------------------|------------------|----------------------|
| All tumors                                                  | n = 10               |                  |                      | n = 10               |                  |                      |
|                                                             | <b>r<sub>P</sub></b> | <b>P</b>         | <b>r<sub>S</sub></b> | <b>r<sub>P</sub></b> | <b>P</b>         | <b>r<sub>S</sub></b> |
| VoIPET/VoIDWI                                               | <b>0.90</b>          | <b>&lt;0.001</b> | 0.82                 | <b>0.95</b>          | <b>&lt;0.001</b> | 0.88                 |
| SUV <sub>max</sub> /SUV <sub>mean</sub>                     | <b>1.00</b>          | <b>&lt;0.001</b> | 0.96                 | -                    | -                | -                    |
| ADC <sub>min</sub> /ADC <sub>mean</sub>                     | 0.46                 | 0.18             | 0.41                 | 0.24                 | 0.50             | 0.25                 |
| SUV <sub>max</sub> /ADC <sub>min</sub>                      | -0.15                | 0.68             | 0.04                 | -0.37                | 0.29             | -0.31                |
| SUV <sub>mean</sub> /ADC <sub>mean</sub>                    | -0.21                | 0.55             | -0.16                | -0.35                | 0.31             | -0.41                |
| SUV <sub>max</sub> /ADC <sub>mean</sub> @SUV <sub>max</sub> | 0.12                 | 0.72             | 0.19                 | -                    | -                | -                    |
| ADC <sub>min</sub> /SUV <sub>mean</sub> @ADC <sub>min</sub> | 0.10                 | 0.79             | 0.22                 | -0.09                | 0.80             | -0.28                |
| <b>Spatial match</b>                                        | n = 4                |                  |                      | n = 3                |                  |                      |
|                                                             | <b>r<sub>P</sub></b> | <b>P</b>         | <b>r<sub>S</sub></b> | <b>r<sub>P</sub></b> | <b>P</b>         | <b>r<sub>S</sub></b> |
| SUV <sub>max</sub> /ADC <sub>min</sub>                      | 0.42                 | 0.55             | 0.20                 | -0.61                | 0.50             | -0.50                |
| SUV <sub>mean</sub> /ADC <sub>mean</sub>                    | 0.73                 | 0.20             | 0.40                 | -0.39                | 0.70             | -0.50                |
| SUV <sub>max</sub> /ADC <sub>mean</sub> @SUV <sub>max</sub> | 0.04                 | 0.96             | 0.00                 | -0.02                | 0.99             | 0.50                 |
| ADC <sub>min</sub> /SUV <sub>mean</sub> @ADC <sub>min</sub> | 0.59                 | 0.36             | 0.60                 | -0.15                | 0.89             | -0.50                |
| <b>Spatial mismatch</b>                                     | n = 6                |                  |                      | n = 7                |                  |                      |
|                                                             | <b>r<sub>P</sub></b> | <b>P</b>         | <b>r<sub>S</sub></b> | <b>r<sub>P</sub></b> | <b>P</b>         | <b>r<sub>S</sub></b> |
| SUV <sub>max</sub> /ADC <sub>min</sub>                      | 0.05                 | 0.93             | 0.20                 | -0.23                | 0.62             | -0.14                |
| SUV <sub>mean</sub> /ADC <sub>mean</sub>                    | -0.27                | 0.60             | -0.37                | -0.38                | 0.38             | -0.29                |
| SUV <sub>max</sub> /ADC <sub>mean</sub> @SUV <sub>max</sub> | 0.25                 | 0.62             | 0.26                 | 0.19                 | 0.68             | 0.11                 |
| ADC <sub>min</sub> /SUV <sub>mean</sub> @ADC <sub>min</sub> | 0.56                 | 0.22             | 0.54                 | -0.02                | 0.97             | -0.14                |
| <b>Diameter &lt;3 cm</b>                                    | n = 3                |                  |                      | n = 3                |                  |                      |
|                                                             | <b>r<sub>P</sub></b> | <b>P</b>         | <b>r<sub>S</sub></b> | <b>r<sub>P</sub></b> | <b>P</b>         | <b>r<sub>S</sub></b> |
| SUV <sub>max</sub> /ADC <sub>min</sub>                      | 0.67                 | 0.43             | 0.50                 | -0.61                | 0.50             | -0.50                |
| SUV <sub>mean</sub> /ADC <sub>mean</sub>                    | 0.78                 | 0.30             | 0.50                 | -0.39                | 0.70             | -0.50                |
| SUV <sub>max</sub> /ADC <sub>mean</sub> @SUV <sub>max</sub> | -0.02                | 0.99             | 0.50                 | -                    | -                | -                    |
| ADC <sub>min</sub> /SUV <sub>mean</sub> @ADC <sub>min</sub> | 0.61                 | 0.49             | 0.50                 | -0.15                | 0.89             | -0.50                |
| <b>Diameter &gt;3 cm</b>                                    | n = 7                |                  |                      | n = 7                |                  |                      |
|                                                             | <b>r<sub>P</sub></b> | <b>P</b>         | <b>r<sub>S</sub></b> | <b>r<sub>P</sub></b> | <b>P</b>         | <b>r<sub>S</sub></b> |
| SUV <sub>max</sub> /ADC <sub>min</sub>                      | -0.13                | 0.77             | 0.07                 | -0.23                | 0.62             | -0.14                |
| SUV <sub>mean</sub> /ADC <sub>mean</sub>                    | -0.34                | 0.44             | -0.36                | -0.38                | 0.38             | -0.29                |
| SUV <sub>max</sub> /ADC <sub>mean</sub> @SUV <sub>max</sub> | 0.19                 | 0.68             | 0.11                 | -                    | -                | -                    |
| ADC <sub>min</sub> /SUV <sub>mean</sub> @ADC <sub>min</sub> | 0.19                 | 0.69             | 0.29                 | -0.02                | 0.97             | -0.14                |

Supplemental table 1: Correlation coefficients and p-values for simultaneous PET/MRI. Statistically significant correlations (p<0.05) are indicated in bold. Maximum standardized uptake value (SUV<sub>max</sub>), mean standardized uptake value (SUV<sub>mean</sub>), minimum apparent diffusion coefficient (ADC<sub>min</sub>), mean apparent diffusion coefficient (ADC<sub>mean</sub>).
